# Supplementary material
Source: publisher figshare collection journal article supplement (https://frontiersin.figshare.com/ndownloader/files/24338237)
Supplement: Supplementary file [file 24338237]

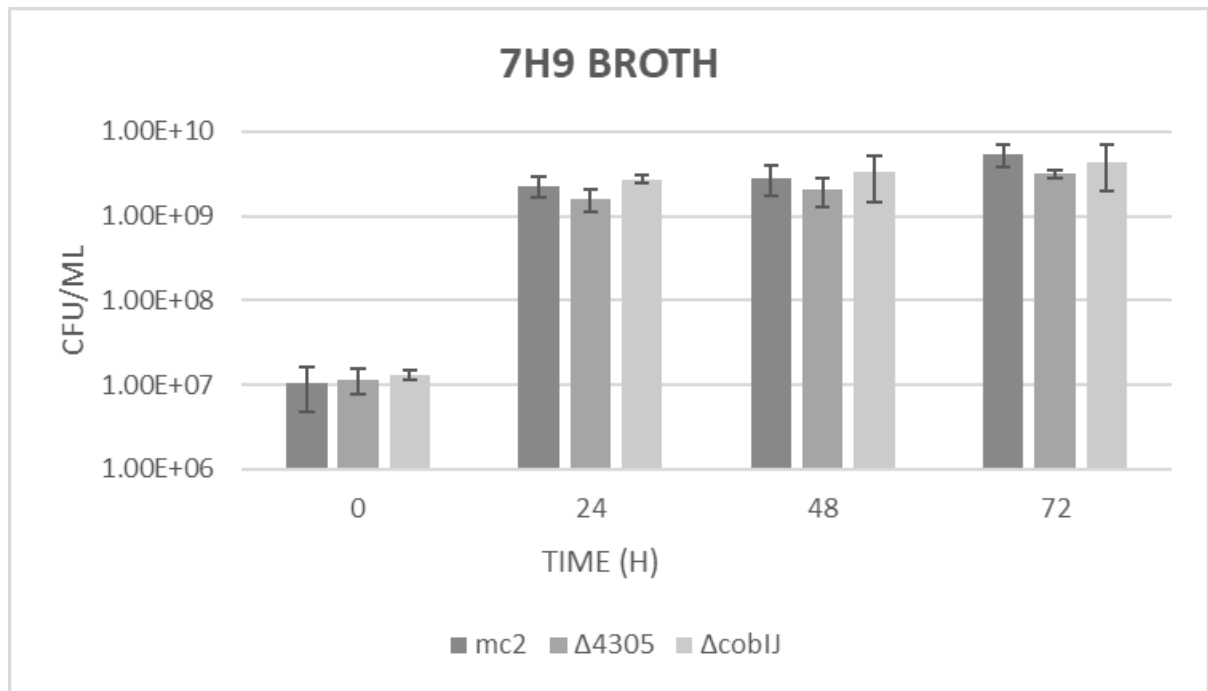

Fig. S5. Evaluation of the number of colony-forming units (CFU) by classical plating method during growth in rich medium 7H9 broth supplemented with cobalt chloride, OADC and Tween 80. The data are representative of three independent replicates. Statistical analysis was performed by comparing cell density at different time points by one-way ANOVA. We did not find statistically significant differences between the strains at different time points.
